# Supplementary material for: Topological insulator Bi2Se3nanowire/Si heterostructure photodetectors with ultrahigh responsivity and broadband response
Source: Royal Society of Chemistry journal article supplement (doi:10.1039/c6tc01083k), 2016-01-01
Supplement: c6tc01083k1.pdf [file c6tc01083k1.pdf]

Electronic supplementary information (ESI)

## Topological Insulator $\text{Bi}_2\text{Se}_3$ Nanowire/Si Heterostructure Photodetector with Ultrahigh Responsivity and Broadband Response

Chang Liu, Hongbin Zhang,\* Zheng Sun, Ke Ding, Jie Mao, Zhibin Shao, Jiansheng Jie\*

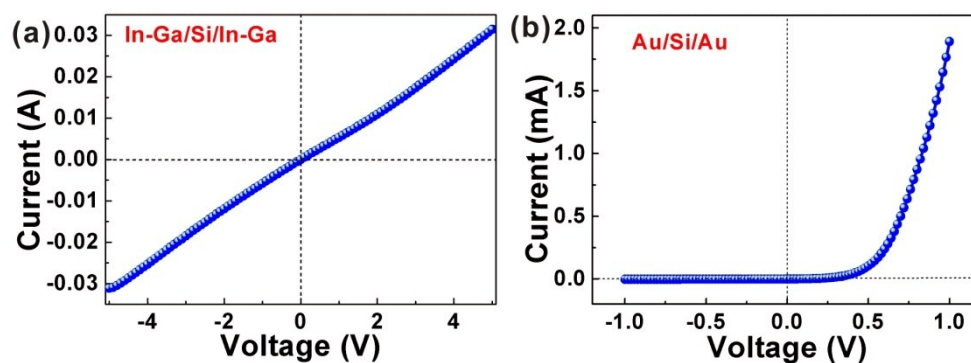

Fig. S1 I-V curves of the In-Ga/Si/In-Ga and Au/Si/Au devices.

Table. S1 Components of an individual  $\text{Bi}_2\text{Se}_3$  NW

| Element | Weight % | Atomic % |
|---------|----------|----------|
| Se      | 28.86    | 51.77    |
| Bi      | 71.13    | 48.22    |

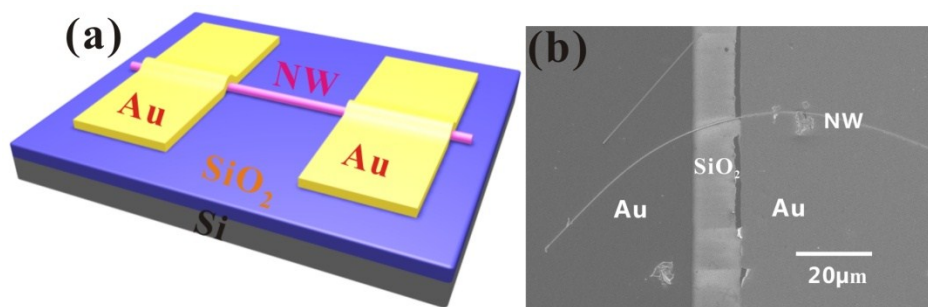

Fig. S2 (a) Schematic illustration of the  $\text{Bi}_2\text{Se}_3$  NW based device with Au Ohmic contacts. (b) Typical SEM image of the Ohmic contact device.

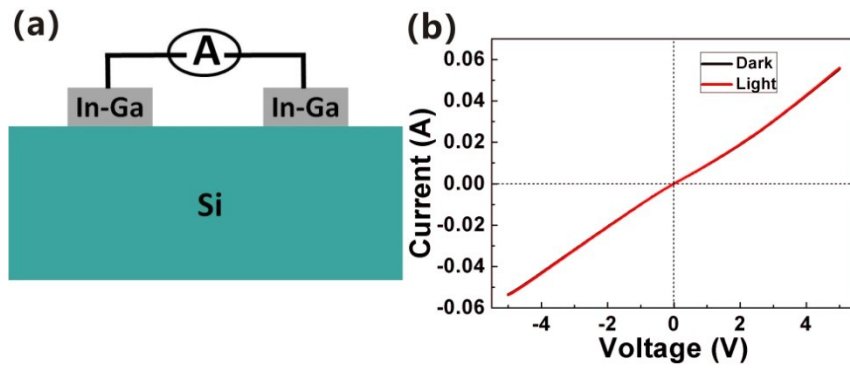

Fig. S3 (a), (b) were the schematic illustration and photoresponse of the In-Ga/Si/In-Ga device.

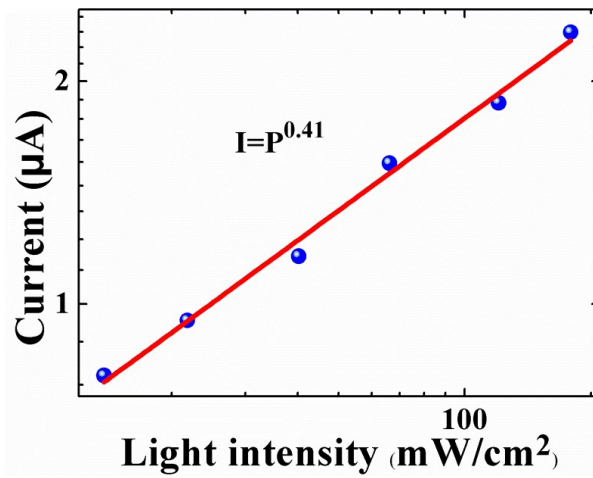

Fig. S4 Photocurrent of the  $\text{Bi}_2\text{Se}_3$  NW/Si heterostructure as a function of light intensity. The curve can be fitted according to power law.

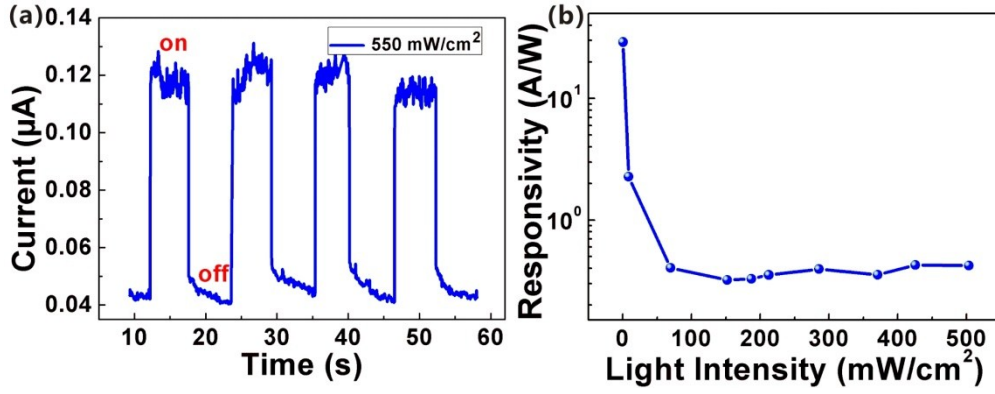

**Fig. S5** (a) Photoresponse of the device measured at bias voltage of -5 V under the illumination of 1064 nm light. (b) Responsivity of the device as a function of light intensity under 1064 nm light illumination.

**Table. S2** Statistics of responsivities of six devices (with number from 1-6)

| Devices            | 1     | 2     | 3     | 4      | 5      | 6     |
|--------------------|-------|-------|-------|--------|--------|-------|
| $R$ ( $A W^{-1}$ ) | 924.2 | 312.5 | 437.5 | 143.75 | 490.63 | 343.7 |

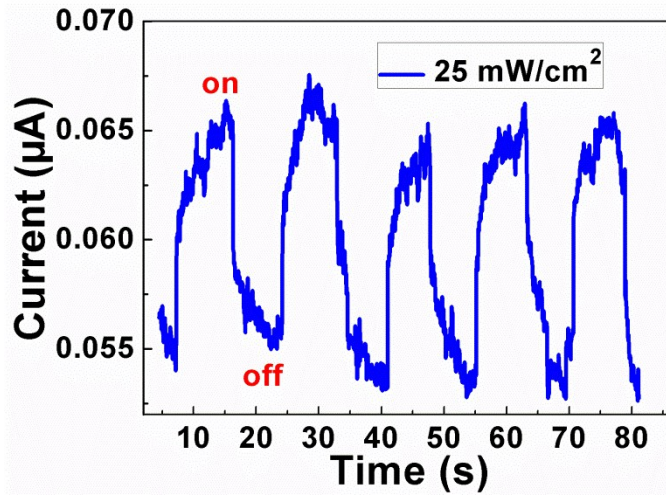

**Fig. S6** Photoresponse of the devices measured under the illumination of 1310 nm light ( $25 \text{ mW cm}^{-2}$ ). The bias voltage was fixed at -5 V.

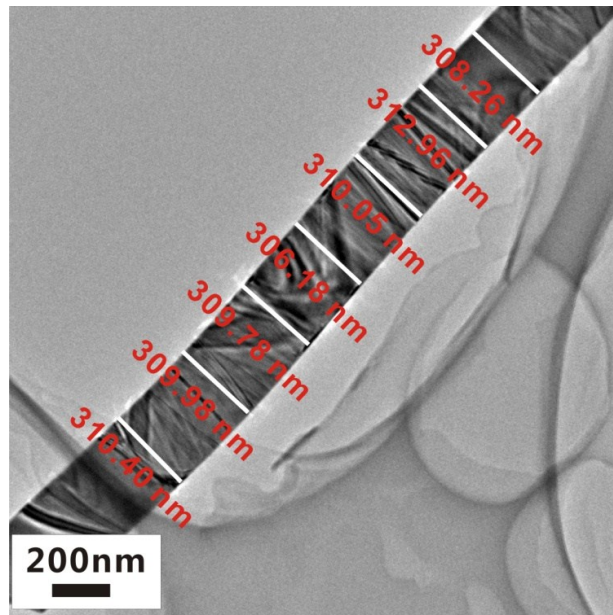

**Fig. S7** Low-resolution TEM image of a single Bi<sub>2</sub>Se<sub>3</sub> NW. The diameter of the NW can be deduced to be  $309.66 \pm 3.48$  nm by measuring different positions in a single NW, and the mean error was less than 1.13%.

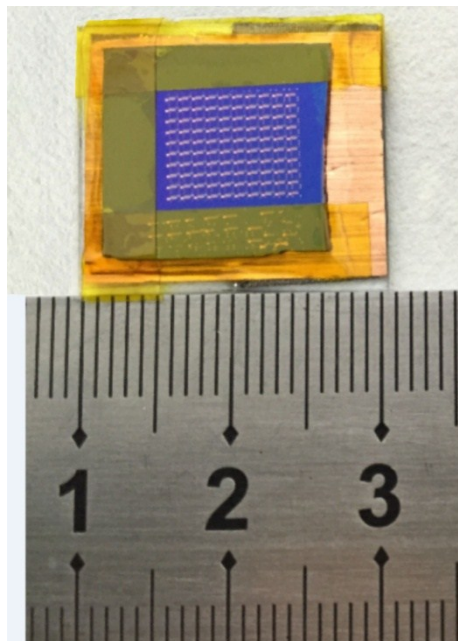

**Fig. S8** Photograph of the Bi<sub>2</sub>Se<sub>3</sub> NWs/Si heterostructure photodetectors, consisting of 10×10 devices in the same substrate.

**Formulae's used in the study:**

|               |                                                             |
|---------------|-------------------------------------------------------------|
| Work function | $\Phi_s = h\nu - E_{\max}$                                  |
| Photocurrent  | $I_{\text{ph}} = I_{\text{light}} - I_{\text{dark}}$        |
| On/off ratio  | On/off ratio = $I_{\text{light}}/I_{\text{dark}}$           |
| Responsivity  | $R \text{ (A W}^{-1}\text{)} = I_{\text{ph}}/P_{\text{in}}$ |
| Detectivity   | $D^* = (AB)^{1/2}/NEP \approx A^{1/2}R/(2qI_d)^{1/2}$       |
| Gain          | $G = R hc/(q\lambda)$                                       |

Where  $\Phi_s$  = Work function (eV)

$h\nu$  = the energy of the He I radiation source (eV)

$E_{\max}$  = maximum binding energy (eV)

$I_{\text{ph}}$  = photocurrent ( $\mu\text{A}$ )

$I_d$  = the dark current ( $\mu\text{A}$ )

$R$  = Responsivity ( $\text{A W}^{-1}$ )

$P_{\text{in}}$  = the incident light power on the active area of the photodetector ( $\text{mW cm}^{-2}$ )

$D^*$  = Detectivity (Jones)

$A$  = the active area of the photodetector ( $\text{cm}^2$ )

$B$  = the bandgap (eV)

$NEP$  = the noise equivalent power (W)

$q$  = the unit charge (C)

$h$  = the Planck's constant (J s)

$c$  = the velocity of light ( $\text{m s}^{-1}$ )

$\lambda$  = the wavelength of illuminated light (nm)
